1 **Causality Mapping Using Resting-State fMRI reveals Suppressed Functional**  
2 **Connectivity in Schizophrenia Patients**

3 Fayyaz Ahmed<sup>1</sup>, Zunira Saghir<sup>1</sup>, Namra Aamir<sup>2</sup>, Turki Abualait<sup>3</sup>, Safee Ullah  
4 Chaudhary<sup>2\*</sup>, Shahid Bashir<sup>4\*</sup>

5

6 <sup>1</sup> Department of Statistics, University of Gujrat, Gujrat, Pakistan,

7 <sup>2</sup> Biomedical Informatics Research Laboratory, Department of Biology, Syed Babar  
8 Ali School of Science and Engineering, Lahore University of Management Sciences,  
9 Lahore, Pakistan,

10 <sup>3</sup> College of Applied Medical Sciences, Imam Abdulrahman Bin Faisal University,  
11 Dammam, Saudi Arabia,

12 <sup>4</sup> Neuroscience Center, King Fahad Specialist Hospital Dammam, Dammam, Saudi  
13 Arabia.

14

15 **Short running title: Causality Mapping and Schizophrenia**

16

17

18 **\*Correspondence:**

19 **Safee Ullah Chaudhary**

20 Biomedical Informatics Research Laboratory, Department of Biology, Syed Babar

21 Ali School of Science and Engineering, Lahore University of Management Sciences,

22 Lahore, Pakistan

23 ORCID No: <https://orcid.org/0000-0002-3758-6581>

24 Email: [safee.ullah.chaudhary@gmail.com](mailto:safee.ullah.chaudhary@gmail.com)

25

26

27 **Shahid Bashir \***

28 Neuroscience Center, King Fahad Specialist Hospital Dammam, Dammam, Saudi  
29 Arabia.

30 P.O. Box 15215, Dammam 31444, Saudi Arabia

31 ORCID No: <https://orcid.org/0000-0001-6286-6895>

32 E-mail: [sbashir10@gmail.com](mailto:sbashir10@gmail.com)

1 Tel.: +966 13 8442222 (Ext. 2423)

2 **Keywords:** Granger causality analysis, migraine, pain-related networks, resting-state  
3 functional magnetic resonance imaging

4

1 **ABSTRACT**

2 Schizophrenia is a psychotic brain disorder in which patients exhibit aberrant  
3 connectivity between different regions of the brain. Neuroimaging is a state-of-the-art  
4 technique that is now increasingly been employed in clinical investigation of  
5 Schizophrenia. In the present study, we have used resting-state functional magnetic  
6 resonance neuroimaging (rsfMRI) to elucidate the cause-and-effect relationships  
7 among four regions of the brain including occipital, temporal, and frontal lobes and  
8 hippocampus in Schizophrenia. For that, we have employed independent component  
9 analysis, a seed-based temporal correlation analysis, and Granger causality analysis  
10 for measuring causal relationships amongst four regions of the brain in schizophrenia  
11 patients. Eighteen subjects with nine patients and nine controls were evaluated in the  
12 study. Our results show that Schizophrenia patients exhibit significantly different  
13 activation patterns across the selected regions of the brain in comparison with the  
14 control. In addition to that, we also observed an aberrant causal relationship between  
15 these four regions of the brain. In particular, the temporal and frontal lobes of patients  
16 with schizophrenia had a significantly lowered causal relationship with the other areas  
17 of the brain. Taken together, the study elucidates the dysregulated brain activity in  
18 Schizophrenia patients, decodes its causal mapping and provides novel insights  
19 towards employment in clinical evaluation of Schizophrenia.

## 1 INTRODUCTION

2 Schizophrenia (SZ) is a chronic mental disorder affecting approximately 1% of the  
3 global population (1). The condition is characterized by cognitive and behavioral  
4 alterations, accompanied by hallucinations, delusions, and disorganized thinking (2,3).  
5 SZ typically develops in young adults between the age of 18 and 35 (4) and has a  
6 lifetime prevalence of 1% (4). Recent research on SZ has uncovered several genetic  
7 and environmental factors that correlates with the development of the disease (4). An  
8 increasing amount of experimental evidence is now suggesting that SZ induces  
9 extensive alterations in the connectivity between various regions of the brain that  
10 results in its functional dysregulation (5,6). Moreover, research studies have also  
11 reported significant reductions in functional connectivity amongst various regions of  
12 the brain in SZ patients (7–9). However, the type and scale of these disconnections,  
13 suppressed functional connectivity and the underlying pathophysiological mechanisms  
14 in SZ remain unclear (11).

15 Advancements in brain imaging techniques and protocols have now enabled scientists  
16 to carry out in-depth investigations of the neuropathological mechanisms of SZ (10–  
17 14). Several groundbreaking studies leveraging these technologies have helped reveal  
18 a wide variety of abnormal structural and functional connections among anatomically  
19 distant regions of the brain in SZ patients (15–18). Investigations using functional  
20 brain imaging have helped elucidate reduced activation in the frontal, striatal, and  
21 parietal regions during the performance of cognitive tasks in patients with SZ (19,20).  
22 Furthermore, altered patterns of neural activation have been reported in the prefrontal  
23 cortices, including the anterior cingulate cortex (ACC), the supplementary motor area  
24 (SMA), the pre-SMA, the parietal cortex, and the subcortical basal ganglia nuclei (20–  
25 23). Data from diffusion tensor imaging have highlighted reduced fractional  
26 anisotropy (FA) in the internal capsule, thalamus, corpus callosum (CC), white matter  
27 microstructures (24), and throughout the entire brain in patients with SZ (25).  
28 Reduced FA in the CC has been associated with higher lateral ventricle (LV) volume,  
29 while higher radial diffusivity (RD) values are associated with larger LV volume in  
30 patients with SZ (26). This suggests that SZ may involve abnormalities in structural  
31 white matter, which connects and activates different regions of the brain.

32 These findings have been supported and expanded upon by several neuroimaging  
33 studies on functional connectivity (FC), which have elucidated temporal associations

1 between various regions of the brain (27). Specifically, this approach has been utilized  
2 to investigate disruptions in functional connectivity in brain of SZ patients (28).  
3 Previous studies have examined specific regions of the brain at resting state (29–31),  
4 and during sensory (32), and cognitive tasks (33) in patients with SZ. Reduced FC has  
5 been extensively reported in the neural pathways of patients with SZ, including the  
6 amygdala subregional-sensorimotor pathway (34), frontotemporal (35),  
7 thalamocortical (36), and cortico-cerebellar pathways (37). Differential FC in brain of  
8 patients with SZ and healthy controls, therefore, could have significant clinical  
9 implications, as psychopharmacological treatments could target aberrant FC in  
10 patients with SZ (39, 40). In addition, these differences could also be used as a  
11 neuroimaging biomarker to guide diagnoses of SZ (41, 42).

12 Towards this goal, in this work, we investigate the resting-state functional  
13 connectivity in brain of patients with SZ and examine the cause-and-effect  
14 relationships among these regions of the brain (38). For that, we have combined three  
15 different methods for analyzing FC, including (i) spatial independent component  
16 analysis (ICA) to identify the characteristics or features of fMRI data that are  
17 maximally independent, (ii) a seed-based temporal correlation analysis (SCA) to  
18 assess time-series associations and connections among regions, and (iii) Granger  
19 causality analysis (GCA) to analyze effective connectivity in the brain. In specific,  
20 spatial ICA is employed to extract the overall connectivity patterns at the whole-brain  
21 level and is used to elucidate the spatial structure of the blood-oxygen-level-dependent  
22 (BOLD) signal (47, 50, 51). The seed-based SCA was used to identify regions, or  
23 “seeds,” that correlate with FC and activity in other seeds or regions using time series  
24 of BOLD signals from seed-voxels and other regions (41–44). Lastly, the GCA was  
25 used to study the bidirectional effects between two variables in a time series (45) to  
26 examine time-lagged causal effects on specific regions of the brain by using time  
27 predictions between an fMRI time series (46,47). The approach helped identify the  
28 dynamic causal interactions between the four selected regions of the brain. Our results  
29 show that the brains of patients with SZ exhibit aberrant activation patterns in the HC,  
30 OL, TL, and FL. Moreover, the functional and structural connectivity among these  
31 four regions differs significantly in patients with SZ, which has been validated by the  
32 VAR models using Granger causality. Last, our causal analysis through mediation  
33 revealed significant differences in decision making in patients with SZ.

1 Taken together, this study expands our understanding of the resting-state FC (rsFC) in  
2 patients with SZ at the whole-brain level and reports the aberrations in FC among  
3 multiple regions of the brain using a combination of statistical approaches. The study  
4 also helps characterize the direction of FC among different regions of the brain and  
5 how it differs in patients with SZ from healthy controls (39) thereby providing  
6 valuable insights into the neural basis of SZ (39).

## 1 **METHODOLOGY**

### 2 **2.1 Granger causality**

3 We used a Granger causality (G-causal) test and VAR modeling to analyze the fMRI  
4 data. This method determines the causal relationships between two variables. If a  
5 variable x has a G-causal relationship with another variable y, then the lag values of x  
6 can be used to forecast the future values of y and vice versa. This study examined the  
7 causal relationships among four regions of the brain: the frontal, occipital, and  
8 temporal lobes and the hippocampus.

#### 9 **Mathematical Formulation of Granger Causality**

10 Consider two random variables  $X_t, Y_t$ . Assume a lag length of p. For example, y is  
11 occipital lobe and X is temporal lobe. For occipital and temporal lobes, the model  
12 could be written as:

$$13 \quad T_t = c_1 + a_1 T_{t-1} + a_2 T_{t-2} + \dots + a_p T_{t-p} + b O_{t-1} + b O_{t-2} + \dots + b O_{t-p} + e_t$$

14 Estimate by OLS and test for the following hypothesis:

$$H_0 : \beta_1 = \beta_2 = \dots = \beta_p = 0$$

$$15 \quad H_1 : \text{any } \beta \neq 0$$

16 To check if occipital lobe does granger-cause to temporal lobe or not, here we will  
17 take y as a occipital lobe 'o' and x as a temporal lobe 't'.

18 Unrestricted sum of squared residual:

$$19 \quad RSS_1 = \sum_t \hat{a}_t^2$$

20 Restricted sum of square residual:

$$21 \quad RSS_2 = \sum_t \hat{a}_t^2$$

$$F = \frac{(RSS_2 - RSS_1)}{RSS_1 / (T - 2p - 1)}$$

22

1 Under general condition, the OLS estimate is given by, 
$$b = \left[ \sum_{i=1}^T (o_i o_i') \right]^{-1} \left[ \sum_{i=1}^T (o_i t_i) \right]$$

2 assuming that the  $(k \times k)$  matrix  $\sum_{i=1}^T (o_i o_i')$  is nonsingular the OLS sample residual for  

$$u_i = t_i - o_i' b$$
  
 observation  $t$  is  $t_i - o_i' \beta + \mu_i$ . Often the model is written in matrix  
 4 notation as

5  $T = O\beta + \mu$  Where

6 
$$T_{(T \times 1)} = \begin{bmatrix} t_1 \\ t_2 \\ \vdots \\ t_T \end{bmatrix} \quad O_{(T \times k)} = \begin{bmatrix} o_1' \\ o_2' \\ \vdots \\ o_T' \end{bmatrix} \quad u_{(T \times 1)} = \begin{bmatrix} u_1' \\ u_2' \\ \vdots \\ u_T' \end{bmatrix}$$

7 Then the OLS estimate in  $b = \left[ \sum_{i=1}^T (o_i o_i') \right]^{-1} \left[ \sum_{i=1}^T (o_i t_i) \right]$  can be written as

8 
$$b = \left\{ \begin{bmatrix} o_1' \\ o_2' \\ \vdots \\ o_T' \end{bmatrix} \right\}^{-1} \left\{ \begin{bmatrix} t_1 \\ t_2 \\ \vdots \\ t_T \end{bmatrix} \right\}$$

9 
$$= (O'O)^{-1} (O'T)$$

10 Similarly, residual can be written as:

11 
$$\hat{u} = t - Ob = t - O(O'O)^{-1} O'T = [I_T - O(O'O)^{-1} O'] t = M_x u$$

12 Where  $M_x$  is defined as the following  $(T \times T)$  matrix  $M_x = I_T - O(O'O)^{-1} O'$ . One can

13 readily verify that  $M_x = M_x'$  where idempotent  $M_x M_x = M_x$  and the orthogonal to the

14 columns of  $O$ .  $M_x X = 0$ . OLS sample residuals are orthogonal to the explanatory variables in

15  $O$  and population residual can be found by substituting  $\hat{u} = M_x (O\beta + u) = M_x u$ . The



1 difference between the OLS estimate  $b$  and the true population parameter  $\beta$  is found by

$$b = \left\{ \begin{matrix} \left[ \begin{matrix} o_1' \\ o_2' \\ \vdots \\ o_T' \end{matrix} \right]^{-1} \left[ \begin{matrix} t_1 \\ t_2 \\ \vdots \\ t_T \end{matrix} \right] \\ \left[ o_1, o_2, \dots, o_T \right] \end{matrix} \right\}$$

2 substituting  $T = O\beta + \mu$  into

$$3 \quad b = (O'O)^{-1} O' [O\beta + u] = \beta + (O'O)^{-1} Xu$$

4 Now estimate the F test (Wald test) about beta under assumption. A Wald test of  $H_0$  is based  
5 on the following results. Consider an  $(n \times 1)$  vector  $z \sim N(0, \Omega)$  with non-singular then

$$6 \quad Z' \Omega^{-1} Z \sim \chi^2_{(n)}$$

$$\begin{aligned} Z' \Omega^{-1} Z &= Z' (P \wedge P')^{-1} z \\ &= z' [P']^{-1} \wedge^{-1} P^{-1} z \\ &= [P^{-1} z]' \wedge^{-1} P^{-1} z \\ &= w' \wedge^{-1} w \\ &= \sum_{i=1}^n w_i^2 / \lambda_i \end{aligned}$$

7

8 Where  $w = P^{-1} z$  and  $w$  is Gaussian with mean zero and variance  
9  $E(w w') = E(P^{-1} z z' [P']^{-1}) = P^{-1} \Omega [P']^{-1} = P^{-1} P \wedge P' [P']^{-1} = \wedge$ . Thus  $w' \wedge^{-1} w$  is  
10 the sum of squares of  $n$  independent normal variables each divided by its variance  $\lambda$ . It  
11 accordingly has a  $\chi^2_n$  distribution as claimed. Applying proposition directly to

$$12 \quad Rb \sim N(r, \delta^2 R(O'O)^{-1} R') \quad \text{under } H_0 \quad (Rb - r)' [\delta^2 R(O'O)^{-1} R']^{-1} (Rb - r) \sim \chi^2_m$$

13 Replacing  $\sigma$  with the estimate  $s$  and dividing by the number of restriction gives the Wald form  
14 of the OLS F test of a linear hypothesis.  $F = (Rb - r)' [s^2 R(O'O)^{-1} R']^{-1} (Rb - r) / m$

$$15 \quad F = \frac{(Rb - r)' [\delta^2 R(O'O)^{-1} R']^{-1} (Rb - r) / m}{[RSS / (T - K)] \delta^2}$$

16 The numerator is a  $\chi^2_m$  variable divided by its degree of freedom while the denominator is  
17  $\chi^2_{(T-k)}$  variable divided by its degree of freedom again since  $b$  and  $\mu$  are independent, the  
18 numerator and denominator are independent of each other hence

1  $F = (Rb - r)'[s^2 R(O'O)^{-1} R']^{-1} (Rb - r) / m$  has an exact F(m, T-K) distribution under Ho.

2 Let b denote the unconstrained OLS estimate and let  $RSS_1$  be the residual sum of square

$$RSS_1 = \sum_{t=1}^T (t_t - o_t' b)^2$$

3 resulting from using this estimate. Let  $b^*$  denote the constrained

4 OLS estimate and  $RSS_0$  the residual sum squares from the constrained OLS estimation.

$$RSS_0 = \sum_{t=1}^T (t_t - o_t' b^*)^2$$

5 . Then the Wald form of the F test of a linear hypothesis

6  $F = (Rb - r)'[s^2 R(O'O)^{-1} R']^{-1} (Rb - r) / m$  can equivalently be calculated as

$$F = \frac{(RSS_0 - RSS_1) / m}{RSS_1 / (T - K)}$$

7 .

## 8 **Vector auto regression (VAR) model**

9 VAR models are used for estimating and forecasting in time series data. In  
10 multivariate time series analysis, it is one of most easy to use technique. It is known as  
11 extension of AR model. One of crucial step in VAR is selection of lags for lag  
12 selection we have three criteria's AIC BIC HQIC.

$$\begin{aligned} t_t &= b_{10} - b_{12} o_t + v_{11} t_{t-1} + v_{12} o_{t-1} + \varepsilon_t \\ o_t &= b_{20} - b_{21} t_t + v_{21} t_{t-1} + v_{22} o_{t-1} + \varepsilon_t \end{aligned}$$

14 In above model 'o' represent the occipital lobe and 't' represent the temporal lobe.  
15 VAR models are used for forecasting in time series but we can employ them to check  
16 the Granger causality of the variables. One of the important steps in VAR model is the  
17 selection of lag length which is based on specific criteria.

18

## 19 **Data**

20 The study was approved by the Institutional Review Board of King Khalid University  
21 Hospital. The participants included a selection of 15 healthy controls and 15 patients  
22 with SZ. From these, we selected 18 subjects (9 controls and 9 patients with SZ). All  
23 participants underwent the same number of scans according to our study requirements.  
24 The participants were aged  $33.14 \pm 9.96$  (mean  $\pm$  SD) years. The SZ participants were  
25 recruited through local psychiatric clinics, and the controls were recruited from  
26 hospital volunteers. All participants provided informed written consent before

1 participating. All SZ and control subjects were outpatients and had been clinically  
2 stable for at least two weeks prior to the study. The SZ participants were diagnosed by  
3 a research psychiatrist based on the DSM.IV criteria; the diagnoses were confirmed by  
4 a trained research assistant.

5 Written informed consent was obtained from subjects which was approved by the  
6 Institutional Review Board (IRB) at King Khalid University Hospital (KKUH). All  
7 procedures were conducted according to the Declaration of Helsinki.

8

### 1 **3. RESULTS**

#### 2 **3.1. The brains of patients with SZ exhibit aberrant activation patterns in the** 3 **hippocampus (HC), occipital lobe (OL), temporal lobe (TL), and frontal lobe** 4 **(FL)**

5 To evaluate differences in brain activation patterns in patients with SZ, we obtained  
6 fMRI scans of nine subjects with SZ (**Supplementary Data 1**). Nine clinically  
7 healthy individuals were also scanned and used as controls (**Supplementary Data 2**).  
8 The resulting fMRI scan data were pre-processed for realignment, spatial  
9 normalization, smoothing, and co-registration using statistical parametric mapping  
10 (SPM12) (48) (**Figures 1A, B**). We then compared activation levels in four regions of  
11 interest (ROIs): the hippocampus (HC), the occipital lobe (OL), the temporal lobe  
12 (TL) and the frontal lobe (FL). Brain activation in patients with SZ was compared to  
13 that of the controls using two independent sample *t*-tests (49). We found that average  
14 brain activity in the two groups differed significantly in the HC ( $t(798) = 125.254$ ,  $p$   
15  $< 0.05$ ), the OL ( $t(798) = 43.573$ ,  $p < 0.05$ ), the TL ( $t(798) = 130.784$ ,  $p < 0.05$ ), and  
16 the FL ( $t(798) = -9.774$ ,  $p < 0.05$ ) (**Figure 1C**). We conclude that patients with SZ  
17 have significantly less activation in the HC, the OL, and the TL than healthy controls  
18 (59). However, we also observed significantly higher activation in the FL of patients  
19 with SZ.

#### 20 **3.2. Functional connectivity among the HC, OL, TL, and FL differs significantly** 21 **in patients with SZ**

22 The human brain is a complex neuronal network with variable levels of FC among  
23 different regions. FC gives rise to the physiological functions of different regions of  
24 the brain. Having observed significant variation in the activation of the four ROIs, we  
25 then evaluated the effect of this activation on the FC among these ROIs (28). To do  
26 this, we quantified the FC among the four ROIs by computing the Pearson correlations  
27 for the SZ and control groups (Figures 2A, B). For the controls, the highest positive  
28 correlation was observed between the FL and the TL ( $r = 0.85$ ,  $p < 0.05$ ) while the  
29 lowest positive correlation was between the FL and the OL ( $r = 0.63$ ,  $p < 0.05$ )  
30 (Figure 2A). The smallest negative correlation in the controls was observed between  
31 the HC and the TL ( $r = -0.06$ ), while the largest negative correlation was between the  
32 HC and the OL ( $r = -0.01$ ). For the SZ groups, the highest positive correlation was

1 observed between the FL and the TL ( $r = 0.79, p < 0.05$ ), while the lowest positive  
2 correlation was between the FL and the OL ( $r = -0.26$ ) (Figure 2B). The smallest  
3 negative correlation was between the HC and the TL ( $r = 0.17, p < 0.05$ ), while the  
4 largest negative correlation was between the HC and the OL ( $r = 0.42, p < 0.05$ ).  
5 These results indicate that the functional connectivity network is significantly altered  
6 in patients with SZ (Figures 2C, D).

### 7 **3.3 Patients with SZ exhibit aberrant structural connectivity in the ROIs**

8 Next, to investigate the temporal variations in FC patterns (or *effective structural*  
9 *connectivity*) among the four ROIs, we employed the vector auto regression (VAR)  
10 model (51) at times  $t-2$ ,  $t-1$ , and  $t$ . Between  $t-1$  and  $t$ , the HC exhibited strong causal  
11 connectivity with the OL ( $\hat{\beta}^c = 0.15, p < 0.05$ ) and with the TL ( $\hat{\beta}^c = -0.2, p < 0.05$ ) in  
12 healthy individuals. In patients with SZ, these connections of the HC with the OL and  
13 the TL were completely inhibited (Figure 3; Tables 1, 2). The TL also had strong  
14 causal connectivity with the HC ( $\hat{\beta}^c = -0.05, p < 0.05$ ) and the OL ( $\hat{\beta}^c = 0.12, p < 0.05$ )  
15 in the controls; these connections were also deregulated in the SZ group. The OL had  
16 causal connectivity with the FL ( $\hat{\beta}^c = 0.78, p < 0.05$ ) and vice versa ( $\hat{\beta}^c = -0.07, p <$   
17  $0.05$ ), and the OL had causal connectivity with the TL ( $\hat{\beta}^c = 0.09, p < 0.05$ ) in the  
18 controls; these connections did not appear in patients with SZ. Furthermore, at lag  
19 times  $t-1$  and  $t-2$ , the HC exhibited significantly diminished FC in patients with SZ.  
20 This differed from the controls most remarkably at lag  $t-2$ . Interestingly, at  $t-1$  and  $t-2$ ,  
21 the FL and OL showed enhanced anomalous connectivity in patients with SZ. The TL  
22 maintained its effective structural connectivity in both the controls and the patients  
23 with SZ at lag  $t-2$ .

### 24 **3.4 Validation of VAR models using Granger causality**

25 To validate the structural model of the brain connectivity network obtained through  
26 VAR, we further employed a G-causal test (44) to examine the bidirectional causal  
27 effects of the ROIs on each other in patients with SZ and in the controls. In the  
28 controls (Table 3) the OL and TL regions had significant G-causality with the HC  
29 (Figure 4A). Moreover, the HC and the FL were G-causal for OL activation (Figure  
30 4B), while the OL and the FL had G-causality with the TL (Figure 4C). In the  
31 controls, the TL also had G-causality with the FL (Figure 4D). However, we observed  
32 weaker causal relations among the four ROIs in patients with SZ (Table 4) than in the

1 controls. Specifically, the HC was not G-causal for the other ROIs in patients with SZ  
2 (Figure 4A). However, the TL and the HC continued to have a significant G-causal  
3 relationship with the OL (Figure 4B). Moreover, the OL was G-causal for the TL  
4 (Figure 4C), while the OL and the TL were G-causal for the FL (Figure 4D). Taken  
5 together, these findings confirm our earlier hypotheses on aberrant patterns and  
6 reduced activation in the four ROIs in patients with SZ.

7

### 8 **3.5 Causal analysis through mediation reveals differences in decision making in** 9 **patients with SZ**

10 To investigate differences in the decision-making processes of patients with SZ, we  
11 performed a causal analysis of HC mediation. To do this, we analyzed the role of the  
12 HC as a mediator between the FL and OL in the controls and in patients with SZ  
13 (Figure 5). Our results show that the HC played a significant role in the patients with  
14 SZ (Figure 5B) but was non-significant in the control group (Figure 5A). We further  
15 observed that the FL disturbed the activity of the OL and the HC in patients with SZ,  
16 while in the controls this effect was non-significant (Table 5).

17

18

## 1 4. DISCUSSION

2 This study examined rsFC in patients with SZ on a whole-brain scale. The results  
3 show that the parietal region has less connectivity to bilateral DLPFC, while the  
4 parietal and frontal regions have strong connectivity in patients with SZ. Our results  
5 also showed that patients with SZ exhibited significantly less activation in the HC, the  
6 OL, and the TL than healthy controls (61), while the FL showed significantly more  
7 activation in patients with SZ. Abnormal functional connectivity in the prefrontal  
8 cortex may reflect psychopathologies such as an inability to allocate internal or  
9 external attentional resources, a crucial skill for goal-oriented behaviors (61, 62).  
10 Working memory and decision-making deficits have also been repeatedly reported in  
11 patients with SZ; these symptoms are often linked to abnormal functioning of the  
12 prefrontal cortex (63, 64). Temporal hallucinations and delusions are the main  
13 characteristics of SZ; these are mainly attributed to aberrant FC in the temporal cortex  
14 (65, 66). There is also a well-established link between SZ and the hippocampus, a  
15 complex region of the brain that plays a critical role in multiple cognitive domains,  
16 including memory, imagination, and emotions (67, 68), that are known to be impaired  
17 in patients with SZ (69).

18 Approaches such as spatial independent component analysis (ICA), seed-based  
19 temporal correlation analysis (SCA) and Granger causality analysis (GCA) can be  
20 used to explore the activity and functions of the intrinsic neuronal network using  
21 rsfMRI data (70–73). Our findings are consistent with those of other studies. For  
22 example, one study by (74) observed reduced degree centrality (DC) of the bilateral  
23 putamen nuclei in patients with SZ compared to controls. DC is an index used to  
24 identify the regions of the brain (at the whole-brain level) that display functional  
25 deficits in patients with SZ. That study also observed a lack of causal connectivity  
26 between the putamen and multiple regions of the default mode network (DMN), the  
27 orbital area of the inferior frontal cortex, and the right fusiform in patients with SZ. In  
28 addition, a previous study found abnormal rsFC in the amygdala subregional-  
29 sensorimotor regions of the brain in patients with SZ; this abnormality was also  
30 associated with positive symptoms in patients with SZ (75). A similar pattern of  
31 altered rsFC has been observed throughout the entire brain in patients with SZ.  
32 Disrupted pathways from the limbic areas to the thalamus have also been  
33 demonstrated using resting-state effective connectivity (rsEC) analysis (76).

1 Furthermore, a wide range of alterations to thalamic nuclei functional connectivity  
2 have been observed in the cortico-cerebellar-thalamo-cortical circuit pathways of  
3 patients with SZ (77). A systematic review of task and rsfMRI studies demonstrated  
4 the convergence of brain neural dysfunction between tasks and rsfMRI abnormalities  
5 in the prefrontal regions, including the dorsal lateral prefrontal cortex, the orbital  
6 frontal cortex, and the TL, particularly the superior temporal gyrus (78). Together,  
7 these previous findings demonstrate that patients with SZ exhibit altered FC and  
8 effective connectivity (EC) among large regions of the brain. Moreover, brain rsFC  
9 and rsEC can be used as diagnostic markers for SZ and might be implicated in  
10 therapeutic interventions as well.

11 A major strength of this study is its use of a combination of three different FC analysis  
12 methods to investigate functional disconnections between various regions of the brain.  
13 However, the study does have some limitations, which should be considered when  
14 interpreting the results. Most significantly, the sample size in the present study is  
15 small. Additional longitudinal follow-up studies with larger samples are needed to  
16 elucidate the alterations in FC between regions of the brain in patients with SZ.

17 **Conclusion:** GCA is a useful tool for characterizing the functional direction of time-  
18 series data. GCA has broad implications in the neurosciences and neuroimaging  
19 because of the importance of the FC of different regions of the brain during tasks.  
20 GCA can be used to characterize the significant functional directions of different  
21 regions of the brain. In the above diagram, the functional direction of different regions  
22 of the brain are indicated by arrows. These arrows illustrate the significant Granger  
23 causes in the patients with SZ (red) and the control subjects (black) in our study. We  
24 can conclude that, in patients with SZ, some regions of the brain are less active than  
25 those of healthy subjects during task performance.

26

27 **Ethical publication statement:** We confirm that we have read the Journal's position  
28 on issues involved in ethical publication and affirm that this report is consistent with  
29 those guidelines.

30

31 **Disclosure**

32 Neither of the authors has any conflict of interest to disclose



1

2 **Acknowledgements:**

3 The authors would like to thank participants and their family members.

4

## 1 5. REFERENCES

- 2 1. Insel TR. Rethinking Schizophrenia Article in Nature. nature.com. 2010  
3 Nov;468(7321):187–93.
- 4 2. Author AD-D, 2013 undefined. statistical manual of mental disorders,(DSM-5)  
5 Washington.
- 6 3. Buckley P, Clinics BM-P, 2015 undefined. Schizophrenia research: a progress  
7 report. psych.theclinics.com.
- 8 4. Owen MJ, Sawa A, Mortensen PB. Schizophrenia. Lancet. 2016  
9 Jul;388(10039):86–97.
- 10 5. Friston K, Brown H, Siemerkus J, research KS-S, 2016 undefined. The  
11 dysconnection hypothesis (2016). Elsevier.
- 12 6. Stephan K, Baldeweg T, psychiatry KF-B, 2006 undefined. Synaptic plasticity  
13 and dysconnection in schizophrenia. Elsevier.
- 14 7. Falakshahi H, Vergara V, ... JL-IT, 2020 undefined. Meta-modal Information  
15 Flow: A Method for Capturing Multimodal Modular Disconnectivity in  
16 Schizophrenia. ieeexplore.ieee.org.
- 17 8. Han S, Cui Q, Guo X, Fan Y, Guo J, Zong X, et al. Disconnectivity between  
18 the raphe nucleus and subcortical dopamine-related regions contributes altered  
19 salience network in schizophrenia. Elsevier.
- 20 9. Huang C, Luo Q, Palaniyappan L, ... AY-BP, 2020 undefined. Transdiagnostic  
21 and Illness-specific Functional Dysconnectivity Across Schizophrenia, Bipolar  
22 Disorder and Major Depression. Elsevier.
- 23 10. Repovs G, Csernansky J, psychiatry DB-B, 2011 undefined. Brain network  
24 connectivity in individuals with schizophrenia and their siblings. Elsevier.
- 25 11. Fornito A, Zalesky A, Pantelis C, Neuroimage EB-, 2012 undefined.  
26 Schizophrenia, neuroimaging and connectomics. Elsevier.
- 27 12. Pettersson-Yeo W, Allen P, Benetti S, ... PM-N&, 2011 undefined.  
28 Dysconnectivity in schizophrenia: where are we now? Elsevier.
- 29 13. Abid H, Ahmad F, Lee SY, Park HW, Im D, Ahmad I, et al. A functional

- 1 magnetic resonance imaging investigation of visual hallucinations in the human  
2 striate cortex. *Behav Brain Funct* [Internet]. 2016 Nov 29 [cited 2020 Sep  
3 8];12(1). Available from: <https://pubmed.ncbi.nlm.nih.gov/27899123/>
- 4 14. Ahmad F, Hussain A, Chaudhary SU, Ahmad I, Ramay SM. A novel method  
5 for detection of voxels for decision making: An fMRI study. *Int J Imaging Syst  
6 Technol* [Internet]. 2016 Jun 1 [cited 2020 Sep 8];26(2):163–7. Available from:  
7 <http://doi.wiley.com/10.1002/ima.22172>
- 8 15. Shafiei G, Markello R, Makowski C, ... AT-B, 2020 undefined. Spatial  
9 patterning of tissue volume loss in schizophrenia reflects brain network  
10 architecture. Elsevier.
- 11 16. Dong D, Wang Y, Chang X, ... CL-S, 2018 undefined. Dysfunction of large-  
12 scale brain networks in schizophrenia: a meta-analysis of resting-state  
13 functional connectivity. *academic.oup.com*.
- 14 17. Lynall M-E, Bassett DS, Kerwin R, Peter †, Mckenna J, Kitzbichler M, et al.  
15 Behavioral/Systems/Cognitive Functional Connectivity and Brain Networks in  
16 Schizophrenia. *Soc Neurosci*. 2010;
- 17 18. neuroscience MR-D in clinical, 2013 undefined. Schizophrenia and abnormal  
18 brain network hubs. *ncbi.nlm.nih.gov*.
- 19 19. Yoon JH, Minzenberg MJ, Ursu S, Walters R, Wendelken C, Ragland JD, et al.  
20 Association of dorsolateral prefrontal cortex dysfunction with disrupted  
21 coordinated brain activity in schizophrenia: Relationship with impaired  
22 cognition, behavioral disorganization, and global function. *Am J Psychiatry*.  
23 2008 Aug;165(8):1006–14.
- 24 20. Minzenberg MJ, Laird AR, Thelen S, Carter CS, Glahn DC. Meta-analysis of  
25 41 Functional Neuroimaging Studies of Executive Function in Schizophrenia.  
26 *jamanetwork.com*.
- 27 21. Snitz BE, MacDonald A, Cohen JD, Cho RY, Becker T, Carter CS. Lateral and  
28 medial hypofrontality in first-episode schizophrenia: Functional activity in a  
29 medication-naive state and effects of short-term atypical antipsychotic  
30 treatment. *Am J Psychiatry*. 2005 Dec;162(12):2322–9.

- 1 22. Sutcliffe G, Harneit A, ... HT-BP, 2016 undefined. Neuroimaging intermediate  
2 phenotypes of executive control dysfunction in schizophrenia. Elsevier.
- 3 23. Vanes L, Mouchlianitis E, Patel K, Barry E, reports KW-S, 2019 undefined.  
4 Neural correlates of positive and negative symptoms through the illness course:  
5 an fMRI study in early psychosis and chronic schizophrenia. nature.com.
- 6 24. Wagner G, Cruz FD Ia, Schachtzabel C, Cortex DG-, 2015 undefined.  
7 Structural and functional dysconnectivity of the fronto-thalamic system in  
8 schizophrenia: a DCM-DTI study. Elsevier.
- 9 25. White T, Magnotta V, ... HB-S, 2011 undefined. Global white matter  
10 abnormalities in schizophrenia: a multisite diffusion tensor imaging study.  
11 academic.oup.com.
- 12 26. Re E Del, Bouix S, Fitzsimmons J, ... GB-P, 2019 undefined. Diffusion  
13 abnormalities in the corpus callosum in first episode schizophrenia: associated  
14 with enlarged lateral ventricles and symptomatology. Elsevier.
- 15 27. Friston K, Neurosci CF-C, 1995 undefined. Schizophrenia: a disconnection  
16 syndrome. fil.ion.ucl.ac.uk.
- 17 28. Bharat Biswal, Zerrin Yetkin Victor M, Haughton James H. Functional  
18 connectivity in the motor cortex of resting human brain using echo-planar mri.  
19 NCBI. 1995;
- 20 29. Liang M, Zhou Y, Jiang T, Liu Z, Tian L, Liu H, et al. Widespread functional  
21 disconnectivity in schizophrenia with resting-state functional magnetic  
22 resonance imaging. journals.lww.com.
- 23 30. Liang S, Li Y, Zhang Z, Kong X, Wang Q, Deng W, et al. Classification of  
24 First-Episode Schizophrenia Using Multimodal Brain Features: A Combined  
25 Structural and Diffusion Imaging Study. Schizophr Bull. 2019;45(3):591–9.
- 26 31. Venkataraman A, Whitford T, ... CW-S, 2012 undefined. Whole brain resting  
27 state functional connectivity abnormalities in schizophrenia. Elsevier.
- 28 32. Wertz C, Hanlon F, Shaff N, ... AD-S, 2019 undefined. Disconnected and  
29 Hyperactive: A Replication of Sensorimotor Cortex Abnormalities in Patients  
30 With Schizophrenia During Proactive Response Inhibition. academic.oup.com.

- 1 33. Meyer-Lindenberg A, Polin JB, Kohn PD, Holt JL, Egan MF, Weinberger DR,  
2 et al. Evidence for abnormal cortical functional connectivity during working  
3 memory in schizophrenia. *Am J Psychiatry*. 2001;158(11):1809–17.
- 4 34. Zhang M, Yang F, Fan F, Wang Z, Hong X, Clinical YT-N, et al. Abnormal  
5 amygdala subregional-sensorimotor connectivity correlates with positive  
6 symptom in schizophrenia. Elsevier.
- 7 35. Goswami S, Beniwal R, Kumar M, ... TB-AJ of, 2020 undefined. A  
8 preliminary study to investigate resting state fMRI as a potential group  
9 differentiator for schizophrenia. Elsevier.
- 10 36. Woodward ND, Heckers S. Mapping Thalamocortical Functional Connectivity  
11 in Chronic and Early Stages of Psychotic Disorders. *Biol Psychiatry*. 2016  
12 Jun;79(12):1016–25.
- 13 37. Lungu O, Barakat M, Laventure S, ... KD-S, 2013 undefined. The incidence  
14 and nature of cerebellar findings in schizophrenia: a quantitative review of  
15 fMRI literature. *academic.oup.com*.
- 16 38. Beckmann CF, DeLuca M, Devlin JT, Smith SM. Investigations into resting-  
17 state connectivity using independent component analysis. *Philos Trans R Soc B*  
18 *Biol Sci*. 2005;360(1457):1001–13.
- 19 39. Calhoun VD, Adali T. Multisubject Independent Component Analysis of fMRI:  
20 A Decade of Intrinsic Networks, Default Mode, and Neurodiagnostic  
21 Discovery. *IEEE Rev Biomed Eng*. 2012;5:60–73.
- 22 40. Calhoun VD, de Lacy N. Ten Key Observations on the Analysis of Resting-  
23 state Functional MR Imaging Data Using Independent Component Analysis.  
24 *Neuroimaging Clin N Am*. 2017 Nov;27(4):561–79.
- 25 41. Joel SE, Caffo BS, Van Zijl PCM, Pekar JJ. On the relationship between seed-  
26 based and ICA-based measures of functional connectivity. *Magn Reson Med*.  
27 2011 Sep;66(3):644–57.
- 28 42. Cole DM, Smith SM, Beckmann CF. Advances and pitfalls in the analysis and  
29 interpretation of resting-state FMRI data. Vol. 4, *Frontiers in Systems*  
30 *Neuroscience*. 2010.

- 1 43. ... TG-3rd IC on C for, 2016 undefined. Resting state fMRI analysis using  
2 seed based and ICA methods. [ieeexplore.ieee.org](http://ieeexplore.ieee.org).
- 3 44. Wu L, Caprihan A, Bustillo J, Mayer A, NeuroImage VC-, 2018 undefined. An  
4 approach to directly link ICA and seed-based functional connectivity:  
5 Application to schizophrenia. Elsevier.
- 6 45. Society CG-E journal of the E, 1969 undefined. Investigating causal relations  
7 by econometric models and cross-spectral methods. JSTOR.
- 8 46. Wang X, Li F, Zheng H, Wang W, Zhang W, ... ZL-S, et al. Breakdown of the  
9 striatal-default mode network loop in schizophrenia. Elsevier.
- 10 47. Guo W, Liu F, Xiao C, Yu M, Zhang Z, Liu J, et al. Increased causal  
11 connectivity related to anatomical alterations as potential endophenotypes for  
12 schizophrenia. [ncbi.nlm.nih.gov](http://ncbi.nlm.nih.gov).
- 13 48. Friston K. Statistical parametric mapping. 2014.
- 14 49. Gosset WS. Independent sample t tests. 1908.
- 15 50. Zhou B1, Tan C, Tang J CX. Brain functional connectivity of functional  
16 magnetic resonance imaging of patients with early-onset schizophrenia.  
17 [pubmed.gov](http://pubmed.gov). 2010;35(1):17–24.
- 18 51. Dimitrios Asteriou SGH. VAR Model. In: Applied econometrics. 3rd ed. Red  
19 Globe Press; p. 552.
- 20 52. Mingrui Xia ,Jinhui Wang YH. BrainNet Viewer: A Network Visualization  
21 Tool for Human Brain Connectomics. 2013.

22

23

24

25

26

27

28

29

30

1 **FIGURE LEGEND:**

2 **Figure 1 –Brain Activation in Schizophrenia Patients in Comparison with**  
3 **Healthy Individuals.** Axial slices of activations in HC, TL, OL, and FL of: (A)  
4 healthy individuals (control), and (B) schizophrenia patients, at resting state. (C) Bar  
5 chart of average activations in ROIs for control and patients.

6 **Figure 2 - Correlation Between ROIs in Schizophrenia.** Person correlation between  
7 ROIs in (A) Control, (B) Schizophrenia patients. Connectivity in ROIs in (C) Control,  
8 and (D) Schizophrenia patients, using BrainNet Viewer (52).

9 **Figure 3 – Structural Connectivity in ROIs.** (A) Significant causality links in  
10 control between HC, OL, FL and TL, (B) Significant causality links in patients  
11 between HC, OL, FL and TL.

12 **Figure 4– Structural Connectivity in ROIs obtained through Granger Causality**  
13 **for HC, OL, TL, and FL.** Blue and Red arrows show significant granger causality  
14 between ROIs for the control case and SZ patients, respectively.

15 **Figure 5 – Mediation Analysis in ROIs.** (A) Significant mediation in control  
16 between HC, OL, and FL, (B) Significant mediation in patients between HC, OL, and  
17 FL.

18

19

20

21

22

23

24

25

26

27

28

1 **TABLE LEGEND:**

2 **Table 1 - Estimated VAR Model for Control.** “*Mod (1-4) at lag1*” is the VAR  
 3 model till lag 1,  $\hat{\beta}^c_{t-1}$  is the coefficient of variation for control case at lag 1,  $\hat{\beta}^c_{t-2}$  is  
 4 coefficient of variation for control case at lag 2,  $t$  is the test statistic, S.E is the  
 5 standard error of the model,  $p$  value is the probability of obtaining test results by  
 6 chance.

| Mod (1-4) at lag1 | $\hat{\beta}^c_{t-1}$ | S.E  | t     | p     | Mod (1-4), at lag 2 | $\hat{\beta}^c_{t-2}$ | S.E  | t    | p     |
|-------------------|-----------------------|------|-------|-------|---------------------|-----------------------|------|------|-------|
| HC(t) ← HC (t-1)  | 0.51                  | 0.05 | 10.15 | 0.000 | HC(t-2)             | 0.17                  | 0.05 | 3.4  | 0.001 |
| HC(t) ← OL (t-1)  | 0.15                  | 0.07 | 2.14  | 0.032 | OL(t-2)             | -0.17                 | 0.07 | -2.5 | 0.011 |
| HC(t) ← FL (t-1)  | -0.00                 | 0.09 | -0.08 | 0.937 | FL(t-2)             | 0.03                  | 0.09 | 0.3  | 0.714 |
| HC(t) ← TL (t-1)  | -0.20                 | 0.07 | -2.62 | 0.009 | TL(t-2)             | 0.16                  | 0.07 | 2.1  | 0.036 |
| OL(t) ← HC (t-1)  | -0.05                 | 0.03 | -1.35 | 0.178 | HC(t-2)             | -0.02                 | 0.03 | -0.7 | 0.478 |
| OL(t) ← OL (t-1)  | 0.73                  | 0.05 | 13.61 | 0.000 | OL(t-2)             | 0.01                  | 0.05 | 0.2  | 0.832 |
| OL(t) ← FL (t-1)  | 0.22                  | 0.07 | 3.16  | 0.002 | FL(t-2)             | -0.11                 | 0.07 | -1.6 | 0.098 |
| OL(t) ← TL (t-1)  | 0.04                  | 0.05 | 0.75  | 0.456 | TL(t-2)             | 0.04                  | 0.06 | 0.7  | 0.453 |
| FL(t) ← HC (t-1)  | -0.01                 | 0.03 | -0.60 | 0.547 | HC(t-2)             | -0.00                 | 0.03 | -0.2 | 0.777 |
| FL(t) ← OL(t-1)   | -0.07                 | 0.04 | -1.66 | 0.098 | OL(t-2)             | 0.05                  | 0.04 | 1.1  | 0.234 |
| FL(t) ← FL (t-1)  | 0.78                  | 0.05 | 14.15 | 0.000 | FL(t-2)             | 0.03                  | 0.05 | 0.6  | 0.495 |
| FL(t) ← TL (t-1)  | 0.09                  | 0.04 | 2.02  | 0.043 | TL(t-2)             | 0.01                  | 0.04 | 0.4  | 0.681 |
| TL(t) ← HC (t-1)  | -0.05                 | 0.03 | -1.66 | 0.097 | HC(t-2)             | 0.01                  | 0.03 | 0.4  | 0.644 |
| TL(t) ← OL (t-1)  | 0.12                  | 0.04 | 2.58  | 0.010 | OL(t-2)             | -0.11                 | 0.04 | -2.3 | 0.020 |
| TL(t) ← FL (t-1)  | 0.07                  | 0.06 | 1.15  | 0.251 | FL(t-2)             | 0.03                  | 0.06 | 0.6  | 0.541 |
| TL(t) ← TL (t-1)  | 0.67                  | 0.05 | 12.46 | 0.000 | TL(t-2)             | 0.11                  | 0.05 | 2.1  | 0.035 |

7

8 **Table 2 - Estimated VAR Model for Schizophrenia Patients.** “*Mod (1-4) at lag1*”  
 9 is the VAR model till lag 1,  $\hat{\beta}^p_{t-1}$  is the coefficient of variation for patients at lag 1,  
 10  $\hat{\beta}^p_{t-2}$  is coefficient of variation for patients at lag 2,  $t$  is the test statistic, S.E is the  
 11 standard error of the model,  $p$  value is the probability of obtaining test results by  
 12 chance.

| Mod (1-4) at lag1 | $\hat{\beta}^p_{t-1}$ | S.E  | t     | p     | Mod (1-4), at lag 2 | $\hat{\beta}^p_{t-2}$ | S.E  | t     | p     |
|-------------------|-----------------------|------|-------|-------|---------------------|-----------------------|------|-------|-------|
| HC(t) ← HC (t-1)  | 0.36                  | 0.05 | 6.34  | 0.000 | HC(t-2)             | 0.29                  | 0.05 | 5.0   | 0.000 |
| HC(t) ← OL (t-1)  | 0.10                  | 0.06 | 1.69  | 0.091 | OL(t-2)             | -0.01                 | 0.06 | -0.2  | 0.820 |
| HC(t) ← FL (t-1)  | -0.00                 | 0.07 | -0.10 | 0.917 | FL(t-2)             | 0.03                  | 0.07 | 0.4   | 0.638 |
| HC(t) ← TL (t-1)  | 0.10                  | 0.07 | 1.38  | 0.166 | TL(t-2)             | -0.11                 | 0.07 | -1.5  | 0.129 |
| OL(t) ← HC (t-1)  | 0.09                  | 0.04 | 1.96  | 0.050 | HC(t-2)             | -0.10                 | 0.04 | -2.04 | 0.042 |
| OL(t) ← OL (t-1)  | 0.62                  | 0.05 | 11.8  | 0.000 | OL(t-2)             | 0.07                  | 0.05 | 1.45  | 0.148 |
| OL(t) ← FL (t-1)  | -0.01                 | 0.06 | -0.22 | 0.826 | FL(t-2)             | 0.03                  | 0.06 | 0.58  | 0.562 |



|                  |       |      |       |       |         |       |      |       |       |
|------------------|-------|------|-------|-------|---------|-------|------|-------|-------|
| OL(t) ← TL (t-1) | 0.02  | 0.06 | 0.33  | 0.745 | TL(t-2) | 0.10  | 0.06 | 1.70  | 0.089 |
| FL(t) ← HC (t-1) | -0.03 | 0.04 | -0.65 | 0.513 | HC(t-2) | 0.05  | 0.04 | 1.14  | 0.256 |
| FL(t) ← OL (t-1) | 0.13  | 0.05 | 2.65  | 0.008 | OL(t-2) | -0.02 | 0.05 | -0.40 | 0.693 |
| FL(t) ← FL (t-1) | 0.31  | 0.06 | 5.10  | 0.000 | FL(t-2) | 0.25  | 0.06 | 4.21  | 0.000 |
| FL(t) ← TL (t-1) | 0.14  | 0.06 | 2.39  | 0.017 | TL(t-2) | -0.01 | 0.06 | -0.27 | 0.789 |
| TL(t) ← HC (t-1) | -0.06 | 0.04 | -1.47 | 0.142 | HC(t-2) | -0.01 | 0.04 | -0.30 | 0.768 |
| TL(t) ← OL (t-1) | 0.03  | 0.04 | 0.76  | 0.449 | OL(t-2) | 0.09  | 0.04 | 1.93  | 0.053 |
| TL(t) ← FL (t-1) | 0.02  | 0.05 | 0.46  | 0.073 | FL(t-2) | -0.06 | 0.05 | -1.13 | 0.259 |
| TL(t) ← TL (t-1) | 0.69  | 0.05 | 12.3  | 0.000 | TL(t-2) | 0.21  | 0.05 | 3.86  | 0.000 |

1

2 **Table 3: Granger Causality Wald Test for Control.** Equation is a dependent  
 3 variable while excluded is representing independent variable,  $\chi^2$  is a test of  
 4 association, df stands for degree of freedom, Prob> $\chi^2$  is the probability value for  
 5 drawing conclusion about null hypothesis.

| Equation | Excluded | Chi <sup>2</sup> | df | Prob>chi <sup>2</sup> |
|----------|----------|------------------|----|-----------------------|
| HC       | OL       | 6.628            | 2  | 0.036                 |
|          | FL       | 0.223            | 2  | 0.894                 |
|          | TL       | 6.970            | 2  | 0.031                 |
|          | ALL      | 13.056           | 6  | 0.042                 |
| OL       | HC       | 6.265            | 2  | 0.044                 |
|          | FL       | 11.206           | 2  | 0.004                 |
|          | TL       | 3.815            | 2  | 0.148                 |
|          | ALL      | 30.024           | 6  | 0.000                 |
| FL       | HC       | 1.171            | 2  | 0.557                 |
|          | OL       | 2.751            | 2  | 0.253                 |
|          | TL       | 10.839           | 2  | 0.004                 |
|          | ALL      | 15.068           | 6  | 0.020                 |
| TL       | HC       | 3.450            | 2  | 0.178                 |
|          | OL       | 7.001            | 2  | 0.030                 |
|          | FL       | 6.353            | 2  | 0.042                 |
|          | ALL      | 19.55            | 6  | 0.003                 |

6

7 **Table 4 – Granger Causality Wald Test for Patients.** Equation is a dependent  
 8 variable while excluded is representing independent variable  $\chi^2$  is a test of  
 9 association, df stands for degree of freedom, Prob> $\chi^2$  is the probability value for  
 10 drawing conclusion about null hypothesis.

| Equation | Excluded | Chi <sup>2</sup> | df | Prob>chi <sup>2</sup> |
|----------|----------|------------------|----|-----------------------|
| HC       | OL       | 3.977            | 2  | 0.137                 |
|          | FL       | 0.231            | 2  | 0.891                 |
|          | TL       | 2.383            | 2  | 0.304                 |
|          | ALL      | 10.302           | 6  | 0.112                 |
| OL       | HC       | 5.218            | 2  | 0.074                 |
|          | FL       | 0.337            | 2  | 0.845                 |
|          | TL       | 10.669           | 2  | 0.005                 |

|    |     |        |   |       |
|----|-----|--------|---|-------|
|    | ALL | 29.205 | 6 | 0.000 |
| FL | HC  | 1.294  | 2 | 0.524 |
|    | OL  | 9.596  | 2 | 0.008 |
|    | TL  | 13.135 | 2 | 0.001 |
|    | ALL | 38.862 | 6 | 0.000 |
| TL | HC  | 3.747  | 2 | 0.154 |
|    | OL  | 10.069 | 2 | 0.007 |
|    | FL  | 1.273  | 2 | 0.529 |
|    | ALL | 13.544 | 6 | 0.035 |

1

2 **Table 5 – Mediation Analysis for Regions of Interest.** S.E. stands for standard error,

3 C.R. is the confidence ratio and P is the probability value.

|                 |                  |               |                    |                 |             |             |          |
|-----------------|------------------|---------------|--------------------|-----------------|-------------|-------------|----------|
| <b>Control</b>  | <b>Dependent</b> | <b>Effect</b> | <b>Independent</b> | <b>Estimate</b> | <b>S.E.</b> | <b>C.R.</b> | <b>P</b> |
|                 | HC               | <---          | OL                 | -0.048          | 0.045       | -1.062      | 0.288    |
|                 | FL               | <---          | OL                 | 0.476           | 0.035       | 13.791      | ***      |
|                 | FL               | <---          | HC                 | 0.225           | 0.038       | 5.904       | ***      |
| <b>Patients</b> | <b>Dependent</b> | <b>Effect</b> | <b>Independent</b> | <b>Estimate</b> | <b>S.E.</b> | <b>C.R.</b> | <b>P</b> |
|                 | HC               | <---          | OL                 | 0.39            | 0.038       | 10.333      | ***      |
|                 | FL               | <---          | OL                 | 0.464           | 0.035       | 13.098      | ***      |
|                 | FL               | <---          | HC                 | 0.361           | 0.042       | 8.676       | ***      |

4

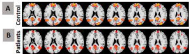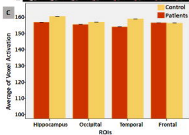

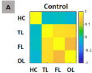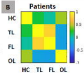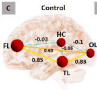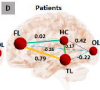



HC

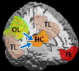

OL

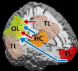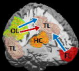

TL

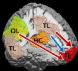

FL

**A****Control**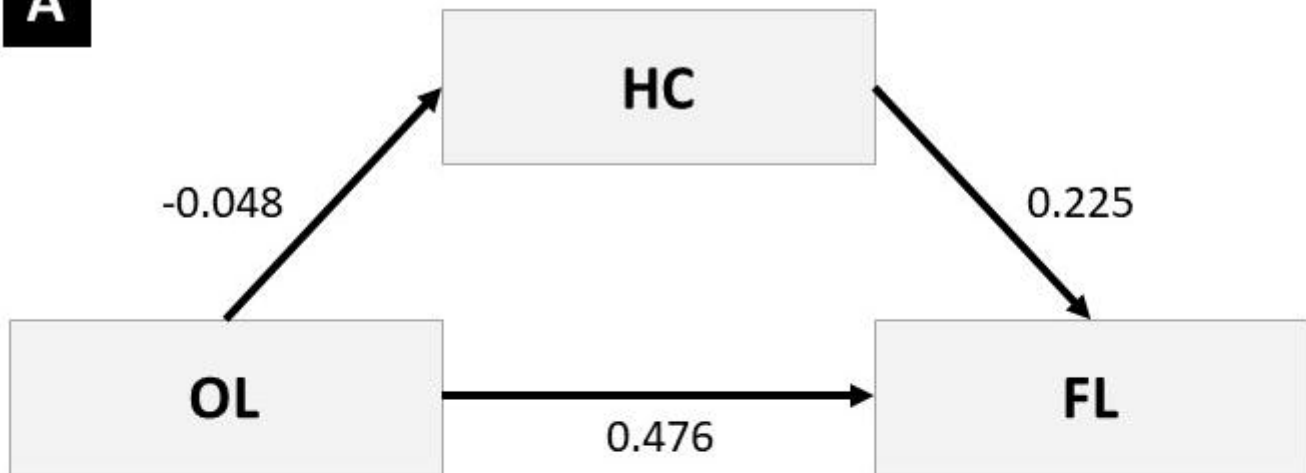**B****Patients**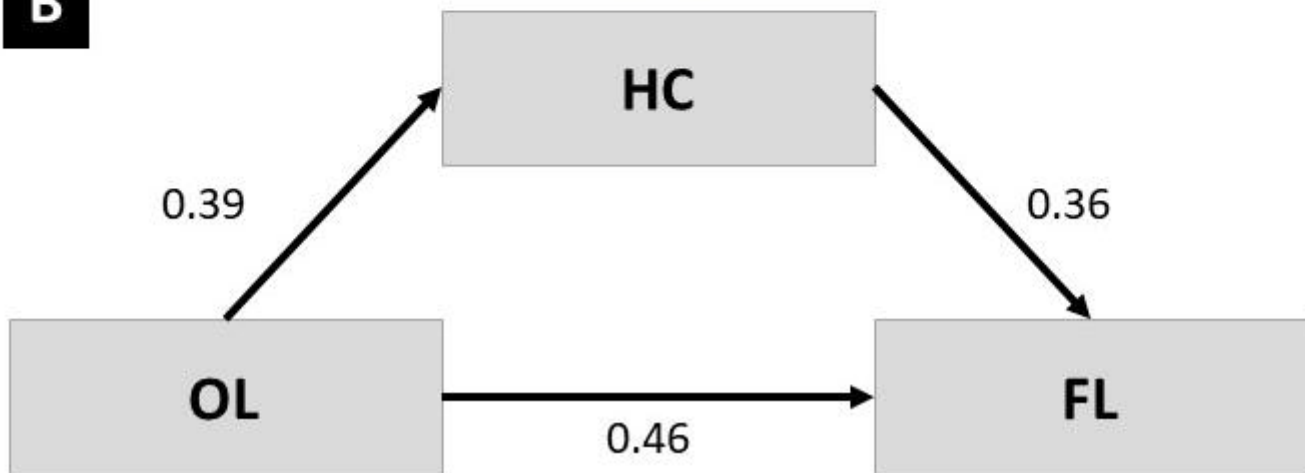

Source: https://www.biorxiv.org/content/10.1101/2020.09.12.295048v1.full.pdf
